# Supplementary material
Source: MDPI journal article supplement (https://www.mdpi.com/2504-5377/4/1/9)
Supplement: s1 [file s1]

Supplementary:

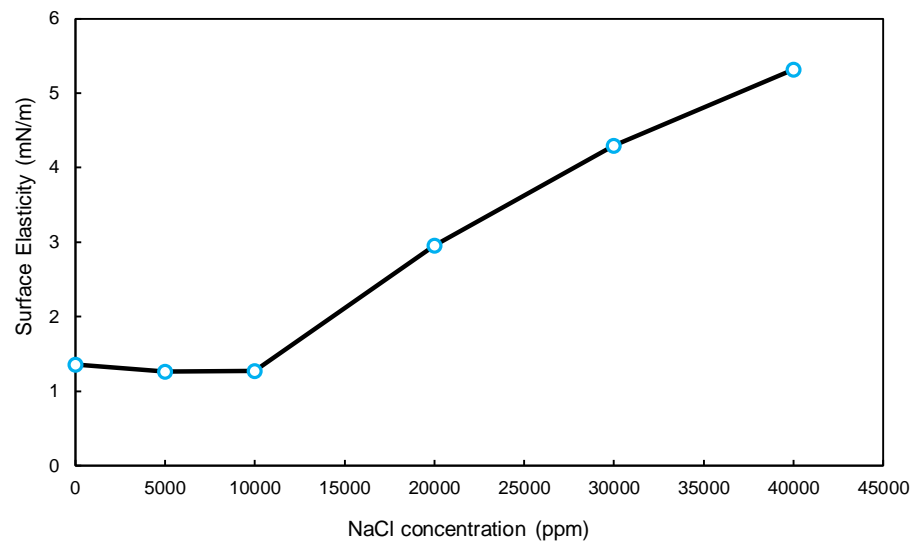

Figure S1. Surface elasticity values of aqueous solutions of 0.1 wt.% XG, 16.6 mM SDS for various concentrations of NaCl at a fixed frequency of 0.05 Hz
